# Supplementary material for: Repeatability of metabolic rate is lower for animals living under field versus laboratory conditions
Source: Oxford University Press journal article supplement (doi:10.1242/jeb.133678), 2016-01-01
Supplement: jeb133678supp.pdf [file jeb133678supp.pdf]

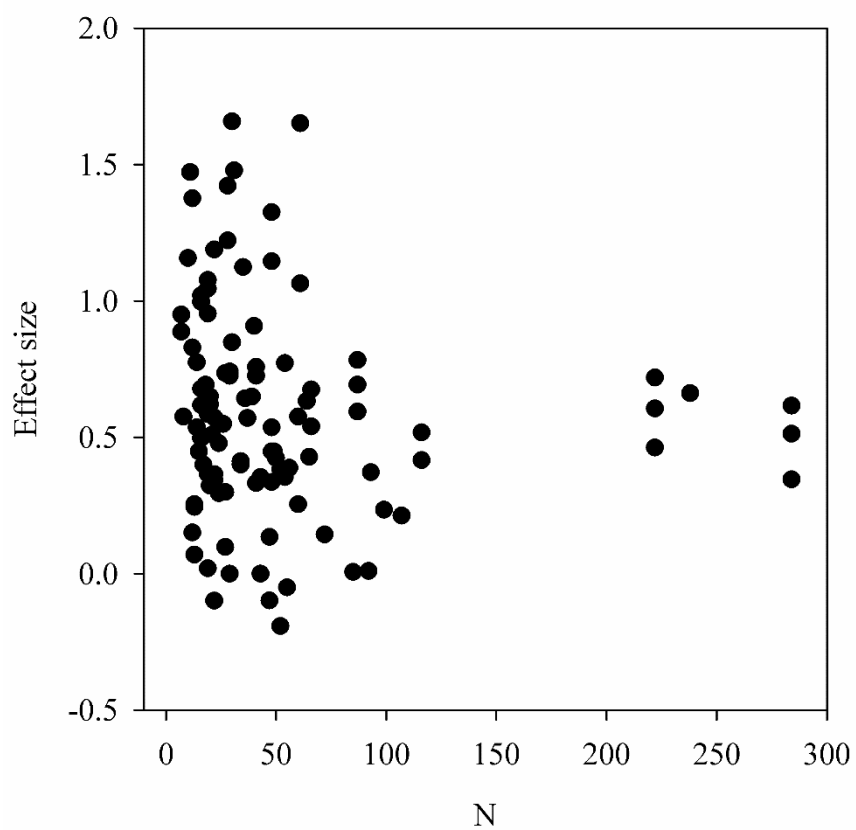

**Fig. S1.** Effect size versus the number of individuals in each study (N). Data are 106 Fisher's Z-transformed effect sizes of the repeatability of metabolic rate (basal, resting, or maximum) derived from 39 studies on birds and mammals.

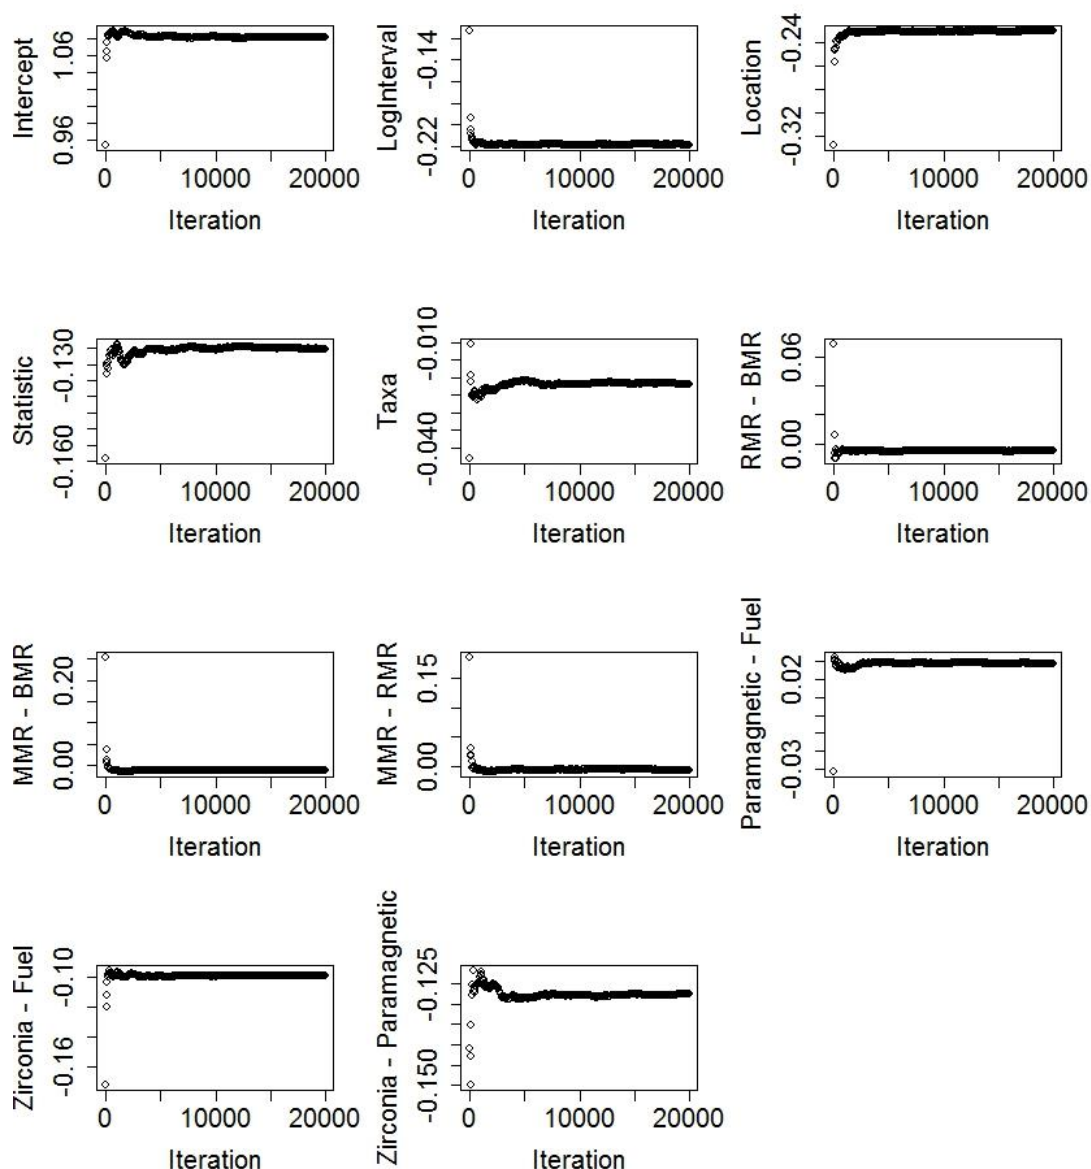

**Fig. S2.** Convergence of parameter estimates after successive re-sampling (iteration) of 106 Fisher's Z transformed effect sizes for estimates of basal, resting, and maximum metabolic rates (BMR, RMR and MMR, respectively) derived from 39 studies. Estimates for location, study taxa, and repeatability statistic are given as the difference between levels of each categorical predictor: wild minus laboratory populations, mammals minus birds, and intra-class minus Pearson's correlation coefficient, respectively. Estimates for metabolic traits are given as the difference between traits: RMR minus BMR, MMR minus BMR, and MMR minus RMR. Estimates for oxygen analyser are given as the difference between types: zirconia-cell minus fuel-cell, paramagnetic minus fuel-cell, and paramagnetic minus zirconia-cell.

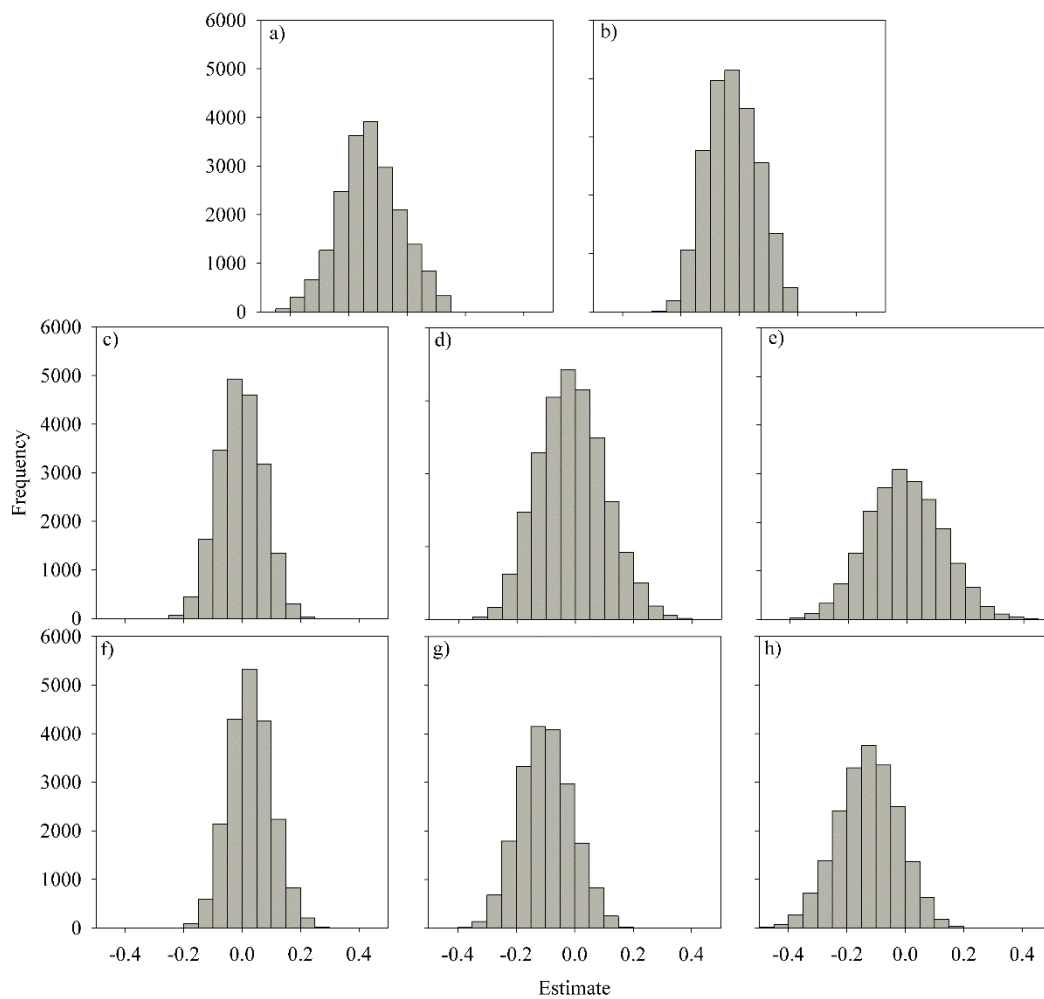

**Fig. S3.** Frequency distributions of parameter estimates obtained by re-sampling repeatedly from a dataset of 106 Fisher's  $Z$  transformed effect sizes for estimates of basal, resting, and maximum metabolic rates (BMR, RMR and MMR, respectively) derived from 39 studies. A single estimate was selected randomly from each study for each replicate. Estimates for repeatability statistic and study taxa and are given as the difference between levels of each categorical predictor: a) intra-class minus Pearson's correlation coefficient and b) mammals minus birds. Estimates for metabolic traits are given as the difference between traits: c) RMR minus BMR, d) MMR minus BMR, and e) MMR minus RMR. Estimates for oxygen analysers are given as the difference between types: f) zirconia-cell minus fuel-cell, g) paramagnetic minus fuel-cell, and h) paramagnetic minus zirconia-cell. Estimates for each parameter were considered statistically significant when their 95% confidence interval (CI) did not overlap with zero (Table S2). See main text for effects of location and interval duration.

**Table S1.** Estimates of repeatability for metabolic rates of endotherms

| Study | Location | Metabolic trait | Taxa   | Oxygen analyser      | Statistic | Repeatability estimate | Interval (days) | Sample size | Reference                    |
|-------|----------|-----------------|--------|----------------------|-----------|------------------------|-----------------|-------------|------------------------------|
| 1     | Lab      | MMR             | Mammal | Zirconia-cell        | $\tau$    | 0.809                  | 1.0             | 35          | (Friedman et al., 1992)      |
| 2     | Lab      | BMR             | Mammal | Zirconia-cell        | $r$       | 0.929                  | 1.0             | 61          | (Hayes et al., 1992)         |
| 2     | Lab      | MMR             | Mammal | Zirconia-cell        | $r$       | 0.787                  | 1.0             | 61          | (Hayes et al., 1992)         |
| 3     | Wild     | MMR             | Mammal | Zirconia-cell        | $r$       | 0.020                  | 547.5           | 19          | (Chappell et al., 1995)      |
| 3     | Wild     | MMR             | Mammal | Zirconia-cell        | $r$       | 0.380                  | 12.0            | 34          | (Chappell et al., 1995)      |
| 3     | Wild     | MMR             | Mammal | Zirconia-cell        | $r$       | 0.400                  | 12.0            | 50          | (Chappell et al., 1995)      |
| 3     | Wild     | MMR             | Mammal | Zirconia-cell        | $r$       | 0.470                  | 547.5           | 21          | (Chappell et al., 1995)      |
| 4     | Lab      | MMR             | Bird   | Zirconia-cell        | $r$       | 0.900                  | 0.1             | 11          | (Chappell et al., 1996)      |
| 4     | Lab      | MMR             | Bird   | Zirconia-cell        | $r$       | 0.901                  | 28.0            | 31          | (Chappell et al., 1996)      |
| 4     | Lab      | MMR             | Bird   | Zirconia-cell        | $r$       | 0.930                  | 56.0            | 30          | (Chappell et al., 1996)      |
| 4     | Lab      | MMR             | Bird   | Zirconia-cell        | $r$       | 0.517                  | 180.0           | 22          | (Chappell et al., 1996)      |
| 4     | Lab      | MMR             | Bird   | Zirconia-cell        | $r$       | -0.190                 | 210.0           | 52          | (Chappell et al., 1996)      |
| 5     | Wild     | MMR             | Bird   | Zirconia-cell        | $r$       | 0.150                  | 112.0           | 12          | (Swanson and Weinacht, 1997) |
| 6     | Lab      | RMR             | Mammal | Zirconia-cell        | $\tau$    | 0.690                  | 14.7            | 30          | (Hayes et al., 1998)         |
| 7     | Wild     | BMR             | Bird   | Paramagnetic         | $\tau$    | 0.350                  | 98.6            | 19          | (Bech et al., 1999)          |
| 7     | Wild     | BMR             | Bird   | Paramagnetic         | $\tau$    | 0.520                  | 192.5           | 8           | (Bech et al., 1999)          |
| 8     | Wild     | MMR             | Mammal | Zirconia-cell        | $r$       | 0.390                  | 68.0            | 34          | (Hayes and O'Connor, 1999)   |
| 9     | Lab      | BMR             | Bird   | CO <sub>2</sub> only | $r$       | 0.890                  | 4.0             | 28          | (Hörak et al., 2002)         |
| 9     | Lab      | BMR             | Bird   | CO <sub>2</sub> only | $r$       | 0.840                  | 8.0             | 28          | (Hörak et al., 2002)         |
| 9     | Lab      | BMR             | Bird   | CO <sub>2</sub> only | $r$       | 0.650                  | 120.0           | 14          | (Hörak et al., 2002)         |
| 10    | Lab      | RMR             | Mammal | Zirconia-cell        | $r$       | 0.620                  | 1.0             | 41          | (Chappell et al., 2004)      |
| 10    | Lab      | MMR             | Mammal | Zirconia-cell        | $r$       | 0.640                  | 1.0             | 41          | (Chappell et al., 2004)      |
| 10    | Lab      | RMR             | Mammal | Zirconia-cell        | $r$       | 0.550                  | 2.0             | 16          | (Chappell et al., 2004)      |
| 10    | Lab      | MMR             | Mammal | Zirconia-cell        | $r$       | 0.770                  | 2.0             | 16          | (Chappell et al., 2004)      |
| 10    | Lab      | RMR             | Mammal | Zirconia-cell        | $r$       | 0.710                  | 3.0             | 7           | (Chappell et al., 2004)      |
| 10    | Lab      | MMR             | Mammal | Zirconia-cell        | $r$       | 0.740                  | 3.0             | 7           | (Chappell et al., 2004)      |
| 11    | Lab      | BMR             | Mammal | Zirconia-cell        | $r$       | 0.720                  | 35.0            | 40          | (Książek et al., 2004)       |
| 12    | Lab      | BMR             | Mammal | Zirconia-cell        | $\tau$    | 0.560                  | 30.0            | 64          | (Labocha et al., 2004)       |

|    |      |     |        |               |          |        |       |     |                             |
|----|------|-----|--------|---------------|----------|--------|-------|-----|-----------------------------|
| 13 | Lab  | MMR | Mammal | Zirconia-cell | <i>r</i> | 0.312  | 28.0  | 20  | (Rezende et al., 2004)      |
| 13 | Lab  | MMR | Mammal | Zirconia-cell | <i>r</i> | 0.551  | 28.0  | 20  | (Rezende et al., 2004)      |
| 13 | Lab  | MMR | Mammal | Zirconia-cell | <i>r</i> | 0.792  | 28.0  | 19  | (Rezende et al., 2004)      |
| 13 | Lab  | MMR | Mammal | Zirconia-cell | <i>r</i> | 0.741  | 28.0  | 19  | (Rezende et al., 2004)      |
| 13 | Lab  | MMR | Mammal | Zirconia-cell | <i>r</i> | 0.780  | 56.0  | 19  | (Rezende et al., 2004)      |
| 13 | Lab  | MMR | Mammal | Zirconia-cell | <i>r</i> | 0.572  | 56.0  | 20  | (Rezende et al., 2004)      |
| 14 | Lab  | RMR | Mammal | Zirconia-cell | <i>r</i> | 0.490  | 1.0   | 48  | (Rezende et al., 2005)      |
| 14 | Lab  | RMR | Mammal | Zirconia-cell | $\tau$   | 0.868  | 1.0   | 48  | (Rezende et al., 2005)      |
| 14 | Lab  | MMR | Mammal | Zirconia-cell | $\tau$   | -0.098 | 1.0   | 47  | (Rezende et al., 2005)      |
| 14 | Lab  | MMR | Mammal | Zirconia-cell | <i>r</i> | 0.134  | 1.0   | 47  | (Rezende et al., 2005)      |
| 14 | Lab  | MMR | Mammal | Zirconia-cell | <i>r</i> | 0.420  | 1.0   | 48  | (Rezende et al., 2005)      |
| 14 | Lab  | MMR | Mammal | Zirconia-cell | $\tau$   | 0.816  | 1.0   | 48  | (Rezende et al., 2005)      |
| 15 | Lab  | BMR | Bird   | Paramagnetic  | $\tau$   | 0.567  | 915.0 | 36  | (Rønning et al., 2005)      |
| 15 | Lab  | BMR | Bird   | Paramagnetic  | $\tau$   | 0.571  | 48.0  | 39  | (Rønning et al., 2005)      |
| 16 | Lab  | BMR | Mammal | Zirconia-cell | $\tau$   | 0.493  | 2.0   | 66  | (Sadowska et al., 2005)     |
| 16 | Lab  | BMR | Mammal | Zirconia-cell | $\tau$   | 0.548  | 2.0   | 284 | (Sadowska et al., 2005)     |
| 16 | Lab  | BMR | Mammal | Zirconia-cell | $\tau$   | 0.600  | 2.0   | 87  | (Sadowska et al., 2005)     |
| 16 | Lab  | BMR | Mammal | Zirconia-cell | $\tau$   | 0.616  | 2.0   | 222 | (Sadowska et al., 2005)     |
| 16 | Lab  | MMR | Mammal | Zirconia-cell | $\tau$   | 0.393  | 2.0   | 116 | (Sadowska et al., 2005)     |
| 16 | Lab  | MMR | Mammal | Zirconia-cell | $\tau$   | 0.432  | 2.0   | 222 | (Sadowska et al., 2005)     |
| 16 | Lab  | MMR | Mammal | Zirconia-cell | $\tau$   | 0.472  | 2.0   | 284 | (Sadowska et al., 2005)     |
| 16 | Lab  | MMR | Mammal | Zirconia-cell | $\tau$   | 0.532  | 2.0   | 87  | (Sadowska et al., 2005)     |
| 16 | Lab  | MMR | Mammal | Zirconia-cell | $\tau$   | 0.333  | 2.0   | 284 | (Sadowska et al., 2005)     |
| 16 | Lab  | MMR | Mammal | Zirconia-cell | $\tau$   | 0.476  | 2.0   | 116 | (Sadowska et al., 2005)     |
| 16 | Lab  | MMR | Mammal | Zirconia-cell | $\tau$   | 0.540  | 2.0   | 222 | (Sadowska et al., 2005)     |
| 16 | Lab  | MMR | Mammal | Zirconia-cell | $\tau$   | 0.588  | 2.0   | 66  | (Sadowska et al., 2005)     |
| 16 | Lab  | MMR | Mammal | Zirconia-cell | $\tau$   | 0.654  | 2.0   | 87  | (Sadowska et al., 2005)     |
| 17 | Lab  | RMR | Bird   | Fuel-cell     | $\tau$   | 0.626  | 8.0   | 27  | (Vézina and Williams, 2005) |
| 17 | Lab  | RMR | Bird   | Fuel-cell     | $\tau$   | 0.516  | 162.0 | 37  | (Vézina and Williams, 2005) |
| 17 | Lab  | RMR | Bird   | Fuel-cell     | $\tau$   | 0.445  | 188.0 | 24  | (Vézina and Williams, 2005) |
| 17 | Lab  | RMR | Bird   | Fuel-cell     | $\tau$   | 0.287  | 196.0 | 24  | (Vézina and Williams, 2005) |
| 18 | Wild | BMR | Mammal | Zirconia-cell | <i>r</i> | -0.099 | 142.0 | 22  | (Bozinovic, 2007)           |

|    |      |     |        |               |          |        |       |     |                               |
|----|------|-----|--------|---------------|----------|--------|-------|-----|-------------------------------|
| 19 | Lab  | BMR | Mammal | Zirconia-cell | <i>r</i> | 0.007  | 60.5  | 85  | (Russell and Chappell, 2007)  |
| 20 | Wild | RMR | Mammal | Fuel-cell     | <i>r</i> | 0.540  | 12.5  | 19  | (Szafrńska et al., 2007)      |
| 20 | Wild | RMR | Mammal | Fuel-cell     | $\tau$   | 0.550  | 12.5  | 19  | (Szafrńska et al., 2007)      |
| 20 | Wild | RMR | Mammal | Fuel-cell     | $\tau$   | 0.070  | 16.8  | 13  | (Szafrńska et al., 2007)      |
| 20 | Wild | RMR | Mammal | Fuel-cell     | <i>r</i> | 0.250  | 16.8  | 13  | (Szafrńska et al., 2007)      |
| 20 | Wild | RMR | Mammal | Fuel-cell     | <i>r</i> | 0.620  | 149.5 | 29  | (Szafrńska et al., 2007)      |
| 20 | Wild | RMR | Mammal | Fuel-cell     | $\tau$   | 0.630  | 149.5 | 29  | (Szafrńska et al., 2007)      |
| 21 | Lab  | BMR | Bird   | Fuel-cell     | $\tau$   | 0.600  | 24.7  | 18  | (Versteegh et al., 2008)      |
| 22 | Wild | BMR | Mammal | Fuel-cell     | $\tau$   | 0.340  | 5.4   | 43  | (Boratyński and Koteja, 2009) |
| 22 | Wild | MMR | Mammal | Fuel-cell     | $\tau$   | 0.340  | 5.4   | 54  | (Boratyński and Koteja, 2009) |
| 22 | Wild | BMR | Mammal | Fuel-cell     | $\tau$   | 0.230  | 56.4  | 99  | (Boratyński and Koteja, 2009) |
| 22 | Wild | MMR | Mammal | Fuel-cell     | $\tau$   | 0.210  | 56.4  | 107 | (Boratyński and Koteja, 2009) |
| 23 | Wild | BMR | Bird   | Paramagnetic  | $\tau$   | 0.404  | 28.0  | 65  | (Broggi et al., 2009)         |
| 23 | Wild | BMR | Bird   | Paramagnetic  | $\tau$   | 0.356  | 154.0 | 93  | (Broggi et al., 2009)         |
| 23 | Wild | BMR | Bird   | Paramagnetic  | $\tau$   | 0.324  | 380.0 | 48  | (Broggi et al., 2009)         |
| 24 | Lab  | RMR | Mammal | Fuel-cell     | $\tau$   | 0.240  | 21.0  | 13  | (Cortes et al., 2009)         |
| 25 | Lab  | RMR | Mammal | Paramagnetic  | <i>r</i> | 0.580  | 15.0  | 238 | (Duarte et al., 2010)         |
| 25 | Lab  | RMR | Mammal | Paramagnetic  | <i>r</i> | 0.380  | 110.0 | 17  | (Duarte et al., 2010)         |
| 25 | Lab  | RMR | Mammal | Paramagnetic  | <i>r</i> | 0.590  | 110.0 | 16  | (Duarte et al., 2010)         |
| 26 | Wild | RMR | Mammal | Fuel-cell     | <i>r</i> | 0.830  | 24.3  | 22  | (Larivee et al., 2010)        |
| 26 | Wild | RMR | Mammal | Fuel-cell     | <i>r</i> | 0.880  | 24.3  | 12  | (Larivee et al., 2010)        |
| 26 | Wild | RMR | Mammal | Fuel-cell     | <i>r</i> | 0.098  | 196.0 | 27  | (Larivee et al., 2010)        |
| 27 | Wild | BMR | Bird   | Paramagnetic  | $\tau$   | 0.143  | 60.0  | 72  | (Bouwhuis et al., 2011)       |
| 27 | Wild | BMR | Bird   | Paramagnetic  | $\tau$   | -0.050 | 91.5  | 55  | (Bouwhuis et al., 2011)       |
| 28 | Wild | MMR | Bird   | Fuel-cell     | <i>r</i> | 0.648  | 17.4  | 54  | (Chappell et al., 2011)       |
| 28 | Wild | MMR | Bird   | Fuel-cell     | <i>r</i> | 0.365  | 430.0 | 52  | (Chappell et al., 2011)       |
| 29 | Lab  | BMR | Mammal | Fuel-cell     | $\tau$   | 0.680  | 14.0  | 12  | (Gonzalez et al., 2012)       |
| 30 | Lab  | BMR | Bird   | Fuel-cell     | $\tau$   | 0.460  | 0.5   | 16  | (Kaseloo et al., 2012)        |
| 30 | Lab  | BMR | Bird   | Fuel-cell     | $\tau$   | 0.760  | 0.5   | 16  | (Kaseloo et al., 2012)        |
| 31 | Wild | RMR | Mammal | Fuel-cell     | $\tau$   | 0.010  | 171.0 | 92  | (Careau et al., 2013)         |
| 32 | Lab  | MMR | Bird   | Zirconia-cell | <i>r</i> | 0.350  | 14.0  | 22  | (Swanson and King, 2013)      |
| 33 | Wild | RMR | Mammal | Fuel-cell     | $\tau$   | 0.330  | 84.0  | 22  | (Szafranska et al., 2013)     |

|    |      |     |        |           |        |       |       |    |                              |
|----|------|-----|--------|-----------|--------|-------|-------|----|------------------------------|
| 34 | Lab  | BMR | Bird   | Fuel-cell | $\tau$ | 0.250 | 16.1  | 60 | (Careau et al., 2014)        |
| 34 | Lab  | MMR | Bird   | Fuel-cell | $\tau$ | 0.520 | 16.1  | 60 | (Careau et al., 2014)        |
| 35 | Lab  | RMR | Mammal | Fuel-cell | $\tau$ | 0.420 | 92.5  | 49 | (Guenther et al., 2014)      |
| 36 | Lab  | BMR | Bird   | Fuel-cell | $\tau$ | 0.820 | 6.0   | 10 | (Jacobs and McKechnie, 2014) |
| 37 | Lab  | BMR | Mammal | Fuel-cell | $\tau$ | 0.500 | 35.0  | 26 | (Sichova et al., 2014)       |
| 37 | Lab  | BMR | Mammal | Fuel-cell | $\tau$ | 0.370 | 533.0 | 56 | (Sichova et al., 2014)       |
| 38 | Wild | BMR | Bird   | Fuel-cell | $\tau$ | 0.420 | 30.0  | 15 | (Cortes et al., 2015)        |
| 38 | Wild | BMR | Bird   | Fuel-cell | $\tau$ | 0.320 | 33.0  | 41 | (Cortes et al., 2015)        |
| 38 | Wild | BMR | Bird   | Fuel-cell | $\tau$ | 0.290 | 39.0  | 27 | (Cortes et al., 2015)        |
| 38 | Wild | MMR | Bird   | Fuel-cell | $\tau$ | 0.490 | 26.0  | 14 | (Cortes et al., 2015)        |
| 38 | Wild | MMR | Bird   | Fuel-cell | $\tau$ | 0.000 | 32.0  | 43 | (Cortes et al., 2015)        |
| 38 | Wild | MMR | Bird   | Fuel-cell | $\tau$ | 0.000 | 36.0  | 29 | (Cortes et al., 2015)        |
| 39 | Wild | BMR | Bird   | Fuel-cell | $\tau$ | 0.340 | 252.0 | 28 | (Mathot et al., 2015)        |

Metabolic trait: BMR=basal metabolic rate, RMR=resting metabolic rate; MMR=maximum metabolic rate; Statistic = Pearson's ( $r$ ) or intra-class ( $\tau$ ) correlation coefficient.

**Table S2.** Parameter estimates and 95 % confidence intervals (CI) from post hoc comparisons among different levels of categorical factors in their effects on the repeatability of metabolic rate. Estimates are given for the difference between levels of each categorical predictor. See main text for effects of location and interval duration.

| Predictor       | Comparison                                      | Median difference | Lower 95% CI | Upper 95% CI |
|-----------------|-------------------------------------------------|-------------------|--------------|--------------|
| Statistic       | intra-class – Pearson's correlation coefficient | -0.13             | -0.33        | 0.09         |
| Taxa            | mammal – bird                                   | -0.03             | -0.18        | 0.15         |
| Metabolic trait | resting – basal metabolic rate                  | -0.01             | -0.15        | 0.14         |
|                 | maximum – basal metabolic rate                  | -0.02             | -0.22        | 0.22         |
|                 | maximum – resting metabolic rate                | -0.01             | -0.25        | 0.24         |
| Oxygen analyser | zirconia – fuel-cell                            | 0.03              | -0.11        | 0.18         |
|                 | paramagnetic – fuel-cell                        | -0.10             | -0.27        | 0.08         |
|                 | paramagnetic – zirconia-cell                    | -0.13             | -0.34        | 0.07         |



## REFERENCES

- Bech, C., Langseth, I. and Gabrielsen, G. W.** (1999). Repeatability of basal metabolism in breeding female kittiwakes *Rissa tridactyla*. *Proceedings of the Royal Society of London. Series B: Biological Sciences* **266**, 2161-2167.
- Boratyński, Z. and Koteja, P.** (2009). The association between body mass, metabolic rates and survival of bank voles. *Functional Ecology* **23**, 330-339.
- Bouwhuis, S., Sheldon, B. C. and Verhulst, S.** (2011). Basal metabolic rate and the rate of senescence in the great tit. *Functional Ecology* **25**, 829-838.
- Bozinovic, F.** (2007). Long-term repeatability of body mass and body temperature (but not basal metabolism) in the free-ranging leaf-eared mouse. *Evolutionary Ecology Research* **9**, 547-554.
- Broggi, J., Hohtola, E., Koivula, K., Orell, M. and Nilsson, J. Å.** (2009). Long-term repeatability of winter basal metabolic rate and mass in a wild passerine. *Functional Ecology* **23**, 768-773.
- Careau, V., Hoyer, B. J., O'Dwyer, T. W. and Buttemer, W. A.** (2014). Among- and within-individual correlations between basal and maximal metabolic rates in birds. *Journal of Experimental Biology* **217**, 3593-3596.
- Careau, V., Réale, D., Garant, D., Pelletier, F., Speakman, J. R. and Humphries, M. M.** (2013). Context-dependent correlation between resting metabolic rate and daily energy expenditure in wild chipmunks. *The Journal of Experimental Biology* **216**, 418-426.
- Chappell, M., Bachman, G. C. and Odell, J.** (1995). Repeatability of Maximal Aerobic Performance in Belding's Ground Squirrels, *Spermophilus beldingi*.
- Chappell, M., Zuk, M. and Johnsen, T.** (1996). Repeatability of aerobic performance in red junglefowl: effects of ontogeny and nematode infection. *Functional Ecology*, 578-585.
- Chappell, M. A., Garland, T., Rezende, E. L. and Gomes, F. R.** (2004). Voluntary running in deer mice: speed, distance, energy costs and temperature effects. *Journal of Experimental Biology* **207**, 3839-3854.
- Chappell, M. A., Savard, J.-F., Siani, J., Coleman, S. W., Keagy, J. and Borgia, G.** (2011). Aerobic capacity in wild satin bowerbirds: repeatability and effects of age, sex and condition. *The Journal of Experimental Biology* **214**, 3186-3196.
- Cortes, P., Quijano, S. A. and Nespolo, R. F.** (2009). Bioenergetics and inter-individual variation in physiological capacities in a relict mammal - the Monito del Monte (*Dromiciops gliroides*). *Journal of Experimental Biology* **212**, 297-304.
- Cortes, P. A., Petit, M., Lewden, A., Milbergue, M. and Vezina, F.** (2015). Individual Inconsistencies in Basal and Summit Metabolic Rate Highlight Flexibility of Metabolic Performance in a Wintering Passerine. *Journal of Experimental Zoology Part a-Ecological Genetics and Physiology* **323**, 179-190.
- Duarte, L. C., Vaanholt, L. M., Sinclair, R., Gamo, Y. and Speakman, J. R.** (2010). Limits to sustained energy intake XII: is the poor relation between resting metabolic rate and reproductive performance because resting metabolism is not a repeatable trait? *The Journal of Experimental Biology* **213**, 278-287.
- Friedman, W. A., Garland Jr, T. and Dohm, M. R.** (1992). Individual variation in locomotor behavior and maximal oxygen consumption in mice. *Physiology & Behavior* **52**, 97-104.
- Gonzalez, J. T., Veasey, R. C., Rumbold, P. L. and Stevenson, E. J.** (2012). Consistency of metabolic responses and appetite sensations under postabsorptive and postprandial conditions. *Appetite* **59**, 228-233.
- Guenther, A., Finkemeier, M.-A. and Trillmich, F.** (2014). The ontogeny of personality in the wild guinea pig. *Animal Behaviour* **90**, 131-139.

- Hayes, J., Garland Jr, T. and Dohm, M.** (1992). Individual variation in metabolism and reproduction of *Mus*: are energetics and life history linked? *Functional Ecology*, 5-14.
- Hayes, J. P., Bible, C. A. and Boone, J. D.** (1998). Repeatability of mammalian physiology: evaporative water loss and oxygen consumption of *Dipodomys merriami*. *Journal of Mammalogy* **79**, 475-485.
- Hayes, J. P. and O'Connor, C. S.** (1999). Natural selection on thermogenic capacity of high-altitude deer mice. *Evolution* **53**, 1280-1287.
- Hörak, P., Saks, L., Ots, I. and Kollist, H.** (2002). Repeatability of condition indices in captive greenfinches (*Carduelis chloris*). *Canadian Journal of Zoology* **80**, 636-643.
- Jacobs, P. J. and McKechnie, A. E.** (2014). Experimental sources of variation in avian energetics: Estimated basal metabolic rate decreases with successive measurements. *Physiological and Biochemical Zoology* **87**, 762-769.
- Kaselloo, P., Crowell, M., Jones, J. and Heideman, P.** (2012). Variation in basal metabolic rate and activity in relation to reproductive condition and photoperiod in white-footed mice (*Peromyscus leucopus*). *Canadian Journal of Zoology* **90**, 602-615.
- Książek, A., Konarzewski, M. and Łapo, I. B.** (2004). Anatomic and energetic correlates of divergent selection for basal metabolic rate in laboratory mice. *Physiological and Biochemical Zoology* **77**, 890-899.
- Labocha, M. K., Sadowska, E. T., Baliga, K., Semer, A. K. and Koteja, P.** (2004). Individual variation and repeatability of basal metabolism in the bank vole, *Clethrionomys glareolus*. *Proceedings of the Royal Society of London B: Biological Sciences* **271**, 367-372.
- Larivee, M. L., Boutin, S., Speakman, J. R., McAdam, A. G. and Humphries, M. M.** (2010). Associations between over-winter survival and resting metabolic rate in juvenile North American red squirrels. *Functional Ecology* **24**, 597-607.
- Mathot, K. J., Nicolaus, M., Araya-Ajoy, Y. G., Dingemans, N. J. and Kempenaers, B.** (2015). Does metabolic rate predict risk-taking behaviour? A field experiment in a wild passerine bird. *Functional Ecology* **29**, 239-249.
- Rezende, E. L., Chappell, M. A., Gomes, F. R., Malisch, J. L. and Garland, T.** (2005). Maximal metabolic rates during voluntary exercise, forced exercise, and cold exposure in house mice selectively bred for high wheel-running. *Journal of Experimental Biology* **208**, 2447-2458.
- Rezende, E. L., Chappell, M. A. and Hammond, K. A.** (2004). Cold-acclimation in *Peromyscus*: temporal effects and individual variation in maximum metabolism and ventilatory traits. *Journal of Experimental Biology* **207**, 295-305.
- Rønning, B., Moe, B. and Bech, C.** (2005). Long-term repeatability makes basal metabolic rate a likely heritable trait in the zebra finch *Taeniopygia guttata*. *Journal of Experimental Biology* **208**, 4663-4669.
- Russell, G. and Chappell, M.** (2007). Is BMR repeatable in deer mice? Organ mass correlates and the effects of cold acclimation and natal altitude. *Journal of Comparative Physiology B* **177**, 75-87.
- Sadowska, E. T., Labocha, M. K., Baliga, K., Stanis, A., Wróblewska, A. K., Jagusiak, W. and Koteja, P.** (2005). Genetic correlations between basal and maximum metabolic rates in a wild rodent: consequences for evolution of endothermy. *Evolution* **59**, 672-681.
- Sichova, K., Koskela, E., Mappes, T., Lantova, P. and Boratynski, Z.** (2014). On personality, energy metabolism and mtDNA introgression in bank voles. *Animal Behaviour* **92**, 229-237.
- Swanson, D. L. and King, M. O.** (2013). Short-term captivity influences maximal cold-induced metabolic rates and their repeatability in summer-acclimatized American goldfinches *Spinus tristis*. *Curr Zool* **59**, 439-448.

- Swanson, D. L. and Weinacht, D. P.** (1997). Seasonal effects on metabolism and thermoregulation in northern bobwhite. *Condor*, 478-489.
- Szafrańska, P., Zub, K. and Konarzewski, M.** (2007). Long-term repeatability of body mass and resting metabolic rate in free-living weasels, *Mustela nivalis*. *Functional Ecology* **21**, 731-737.
- Szafrańska, P. A., Zub, K. and Konarzewski, M.** (2013). Seasonal Variation of Resting Metabolic Rate and Body Mass in Free-Living Weasels *Mustela nivalis*. *Physiological and Biochemical Zoology* **86**, 791-798.
- Versteegh, M. A., Helm, B., Dingemanse, N. J. and Tieleman, B. I.** (2008). Repeatability and individual correlates of basal metabolic rate and total evaporative water loss in birds: a case study in European stonechats. *Comparative Biochemistry and Physiology Part A: Molecular & Integrative Physiology* **150**, 452-457.
- Vézina, F. and Williams, T. D.** (2005). The metabolic cost of egg production is repeatable. *Journal of Experimental Biology* **208**, 2533-2538.
